# Supplementary material
Source: PubMed Central journal article supplement (PMC4978051)
Supplement: ASN.2015060676SupplementaryData.pdf [file ASN.2015060676SupplementaryData.pdf]

# Supp Fig 1

□ db/m   ■ db/db   ■ +CIX   ■ +M920

**a**

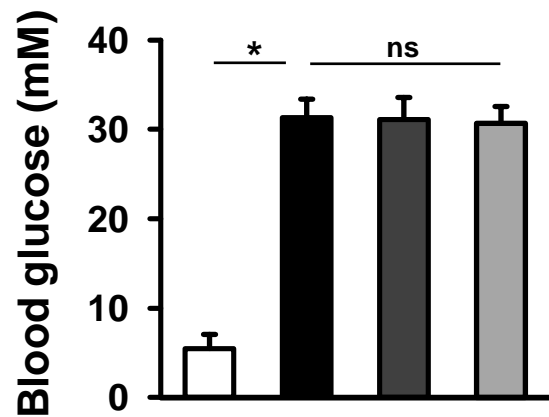

**b**

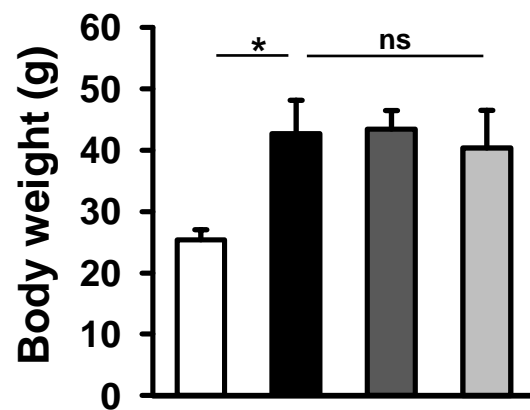

# Supp Fig 2

□ db/m ■ db/db ▒ +Casp1-Inh ◑ +Casp4/5-Inh

**a**

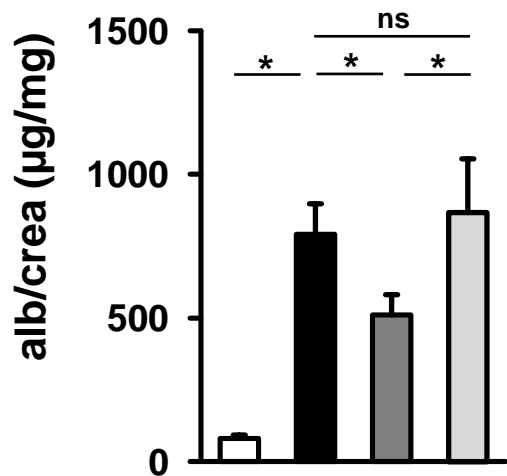

**b**

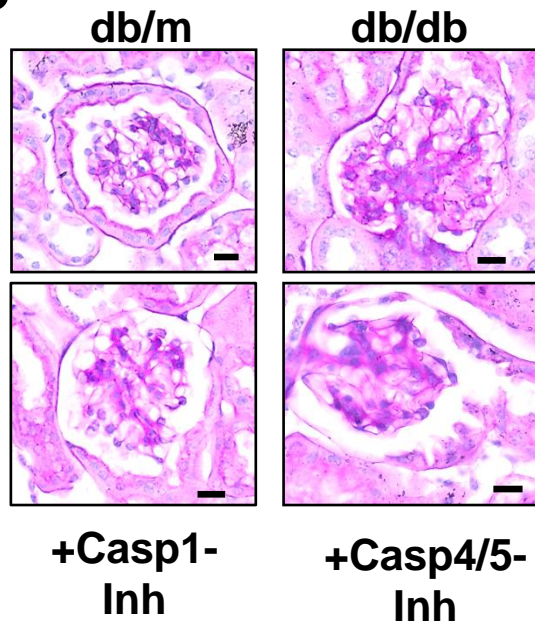

**c**

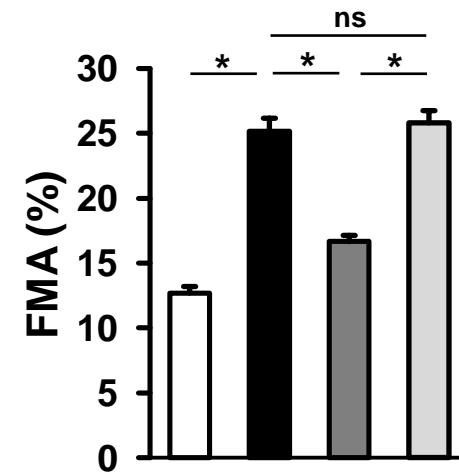

**d**

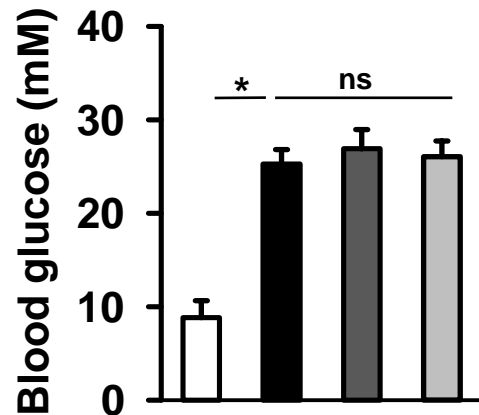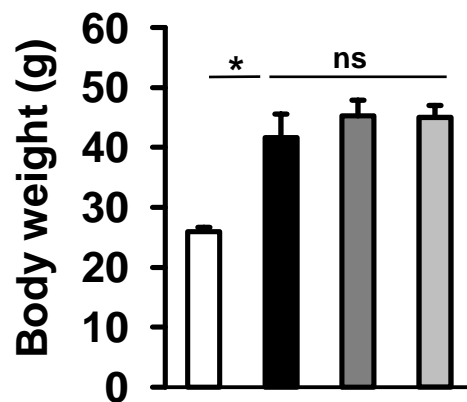

# Supp Fig 3

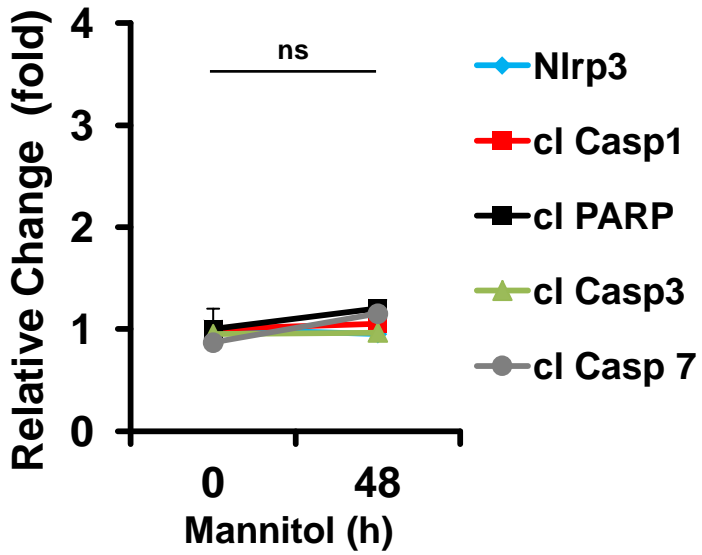

# Supp Fig 4

□ WT C ■ WT DM ■ Casp3<sup>-/-</sup> DM ■ Casp1<sup>-/-</sup> DM ■ Casp1<sup>+/-</sup> DM

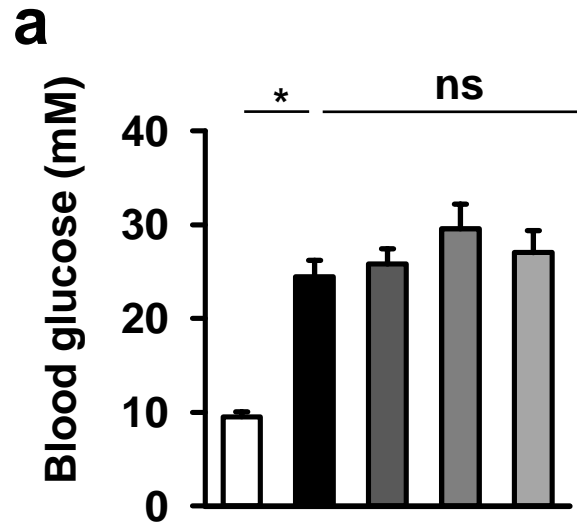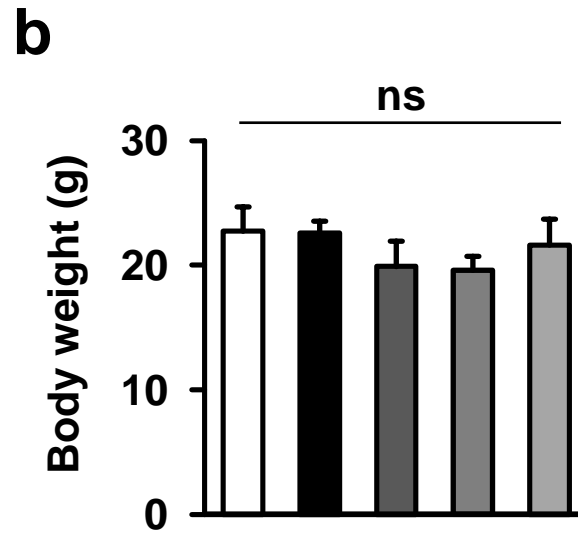

## 1 Additional online Supplementary material and methods

### 3 Reagents

4 The following antibodies were used in the current study: rabbit anti-caspase-1 (pro- and cleaved  
5 caspase-1), Millipore; rabbit anti-Nlrp3, biorbyt; polyclonal anti-mouse IL-1 $\beta$ , Boster Immunoleader;  
6 rabbit anti-cleaved caspase-3, rabbit anti-PARP1, rabbit anti- $\beta$ -actin, rabbit anti caspase-7, from Cell  
7 Signaling Technology; rat anti-IL-18, from MBL international corporation; polycaspase inhibitor M-920  
8 (which inhibits caspase-1, -3, -4, -5, -6, -7 and -8) and polycaspase inhibitor CIX (which inhibits caspase-  
9 3, -6, -7, -8 and -10) from Merck Bioscience; FLICA™ caspase-1 and caspase-3,-7 assay kit from  
10 Immunochemistry Technologies LLC. The following reagents were obtained from Sigma-Aldrich: rabbit  
11 polyclonal anti-GAPDH, streptozotocin, 1% collagen, HOECHST 33258, and pentobarbital. Other  
12 reagents used in the current study were as follows: mouse albumin ELISA quantification kit, Bethyl  
13 Laboratories; mouse IL-1 $\beta$  ELISA kit, R&D system; DMEM, Trypsin-EDTA, penicillin, streptomycin, FCS,  
14 FBS, ITS supplement, and Hepes, PAA Laboratories; IFN- $\gamma$ , Cell Sciences; Accu-Chek test strips, Accu-  
15 Check glucometer, and protease inhibitor cocktail and TUNEL detection kit, Roche Diagnostics; BCA  
16 reagent, Perbio Science; Vectashield mounting medium with DAPI and DAB reagent, Vector  
17 Laboratories; ammonium persulphate (APS) and D-glucose from Merck; PVDF membrane immobilon™,  
18 western chemiluminescent HRP substrate, periodic acid-Schiff reagent, Haemotoxylin, and powdered  
19 milk from ROTH, Trizol reagent, life technologies. RevertAid™ H Minus First Strand cDNA Synthesis kit,  
20 Fermentas.

### 22 Diabetic nephropathy models

23 We used two different mouse models of diabetic nephropathy within the current study. First, we use  
24 the db/db mice, in which treatment was initiated at age 8-weeks and mice were sacrificed after 12  
25 weeks of treatment at the age of 20 weeks. In non-treated db/db mice indices of dNP, e.g.  
26 albuminuria and glomerular extracellular matrix accumulation (FMA, fractional mesangial area), are  
27 markedly increased in 20 weeks old db/db mice.<sup>1</sup>

28 In addition we used the streptozotocin (STZ) plus unilateral nephrectomy model of diabetic  
29 nephropathy.<sup>2-5</sup> In this model diabetes was induced by injections of STZ (i.p., 40 mg/kg body weight,  
30 freshly dissolved in 0.05 M sterile sodium citrate, pH 4.5) for five consecutive days two weeks after  
31 unilateral nephrectomy. Age-matched control mice received 100  $\mu$ L PBS i.p. for five consecutive days.  
32 Mice were considered diabetic if blood glucose levels were above 300 mg/dL 16 d after the last STZ  
33 injection. Blood and tissue samples were obtained after 10 weeks of persistent hyperglycemia in uni-  
34 nephrectomised diabetic mice. Age-matched littermates served as controls.

### 36 Immunoblotting

37 Proteins were isolated and immunoblotting was performed as described.<sup>2, 3, 6-8</sup> In brief, whole cell  
38 lysates were prepared in RIPA buffer (50 mM Tris at pH 7.4, 1% Nonidet P-40, 0.25% sodium  
39 deoxycholate, 150 mM NaCl, 1 mM EDTA, and 1 mM Na<sub>3</sub>VO<sub>4</sub>, supplemented with protease inhibitor  
40 cocktail). Lysates were centrifuged (10,000  $\times$  g for 20 min at 4 °C) and the supernatant was kept, while  
41 the pellet containing debris was discarded. The protein concentration in supernatants was quantified  
42 using BCA reagent. Equal amounts of protein were electrophoretically separated on 10% (vol/vol) or  
43 12.5% (vol/vol) SDS polyacrylamide gels, transferred to PVDF membranes, and probed with the desired  
44 primary antibodies overnight at 4 °C. Membranes were then washed with PBS-T and incubated with  
45 anti-mouse (1:2,000), anti-goat IgG (1:2000), anti-rat IgG (1:2,000) or anti-rabbit IgG (1:2,000)  
46 horseradish peroxidase-conjugated antibodies, as indicated. Blots were developed with the immobilon

1 western chemiluminiscent HRP substrate. To compare and quantify levels of proteins, the density of  
2 each band was measured by using ImageJ software. Equal protein loading was confirmed by immuno-  
3 blotting with  $\beta$ -actin or GAPDH antibody.

#### 4 5 **Cell culture**

6 Conditionally immortalized mouse wild-type podocytes were cultured as described previously.<sup>2, 3, 6-8</sup>  
7 In brief, podocytes were grown on 10 cm<sup>2</sup> cell culture plates coated with 0.2% collagen type 1 at 33°C  
8 in the presence of interferon  $\gamma$  (10 U/ml) to enhance expression of the thermosensitive T antigen.  
9 Under these conditions, cells proliferate and remain undifferentiated. To induce differentiation,  
10 podocytes were grown at 37°C in the absence of interferon  $\gamma$  for 14 days. Experiments were  
11 performed after 14 days of differentiation. Differentiation was confirmed by determining expression  
12 of synaptopodin and Wilms tumor-1 protein.

#### 13 14 **RT-PCR**

15 RNA was isolated using Trizol reagent according to manufacturer's instructions. cDNA was generated  
16 using 1  $\mu$ g total RNA following treatment with DNase (5U/5 $\mu$ g RNA) followed by reverse transcription  
17 using RevertAid™ H Minus First Strand cDNA Synthesis kit (Fermentas, Heidelberg, Germany ). PCR  
18 primers used for expression of IL-1 $\beta$  analyses are as follows: forward 5'- GCAGGCAGTATCACTCATTG -  
19 3', reverse 5'- CGTTGCTTGGTTCTCCTTGT -3'. PCR conditions were optimized (95°C for 2 min, then 35  
20 cycles of 94°C, for 20 sec; 60°C for 20 sec; 72 °c for 30 sec; final extension at 72°C for 12 min) to  
21 detect the logarithmic increase of the amplicon, which was separated on a 1.8% agarose gel and  
22 visualized by ethidium bromide staining. Expression was normalized to  $\beta$ -actin. Reactions lacking  
23 reverse transcriptase served as negative controls.

#### 24 25 **Determination of albuminuria**

26 The day before tissue preparation mice were placed individually in metabolic cages and 12 hour urine  
27 samples were collected.<sup>2, 3, 6-8</sup> Urine albumin was determined using an ELISA for mouse albumin  
28 according to the manufacturer's instructions, and urine creatinine was determined using a  
29 commercially available assay of a modified version of the Jaffe method (X-Pand automated platform;  
30 Siemens).<sup>2, 3, 6-9</sup>

#### 31 32 **Histology and immuohistochemical analysis**

33 Freshly sacrificed mice were perfused first with ice cold PBS-T and then with 4% buffered  
34 paraformaldehyde. Tissues were further fixed with 4% buffered paraformaldehyde for 2 days,  
35 embedded in paraffin and processed for sectioning. Extracellular matrix deposition in glomeruli was  
36 assessed by Periodic acid–Schiff staining. The fractional mesangial area (FMA) was calculated following  
37 the current DCC (Diabetes Complications Consortium) protocol. Briefly, 5  $\mu$ m thick sections were  
38 stained with Periodic acid-Schiff reagent. At least 30 different superficial glomeruli per tissue section  
39 were randomly chosen for analysis. For every investigated glomerulus, total glomerular area and  
40 glomerular tuft area were determined by tracing the outline of the Bowman's capsule and the tuft,  
41 respectively. The FMA was calculated as the percentage of the glomerular area relative to the tuft  
42 area.<sup>5</sup> The Image Pro Plus software (version 6.0) and Image J software were used for image analysis. All  
43 histological analyses were performed by two independent blinded investigators.  
44 Immunohistochemistry and immunofluorescence images were captured with an Olympus Bx43-  
45 Microscope (Olympus, Hamburg, Germany).

1 **Nephromine**

2 Nephromine (Life Technologies, Ann Arbor, MI) was used for analysis and visualization of human  
3 glomerular expression data. Nephromine (nephromine.org) is a web-based platform for integrative  
4 data analysis of microarray gene expression data sets specifically for renal diseases.<sup>10</sup> CASP1, IL-18,  
5 Nlrp3, CASP3, CASP7 and PARP1 mRNA expression were analyzed in microdissected glomeruli of  
6 healthy controls and patients with diabetic nephropathy within the Woroniecka dataset, which is a  
7 collection of gene expression profiling of 13 healthy (defined as control samples from healthy, living  
8 transplant donors or biopsy samples of the unaffected portion of tumor nephrectomies. and having  
9 an eGFR >60 (mL/min), absence of proteinuria, normal serum creatinine and BUN, and <10%  
10 glomerular and tubulointerstitial fibrosis) and 9 samples from patients with diabetic nephropathy  
11 using Affymetrix expression arrays. Array type: Human Genome U133A 2.0 Array. The detailed  
12 clinical characteristics are described elsewhere.<sup>11</sup> Furthermore two different mouse models for  
13 diabetic nephropathy within the Hodgin cohort in nephromine, BKS db/db and eNOS<sup>-/-</sup> BKS db/db  
14 were analyzed for overexpression of the aforementioned markers. The diabetic mice were compared  
15 to db/m or eNOS<sup>+/+</sup> m/m mice, respectively, with 5-9 mice in each group. The phenotypic  
16 characterization of these mice is described elsewhere.<sup>12</sup> Folds, P values and significances shown  
17 reflect results if interrogating the Nephromine database for overexpression.

18  
19 **IL-1 $\beta$ /IL-18 immunoassay**

20 Mouse blood samples were obtained from the inferior vena cava of anticoagulated mice (500 U  
21 unfractionated heparin intraperitoneally intraperitoneal 20 mins before blood sampling).<sup>2, 3, 6-8</sup> Plasma  
22 was obtained by centrifugation of blood samples for 10 min at 2000 g at RT. Plasma samples were  
23 stored at -80°C until analyses. We measured the concentrations of mouse cleaved IL-1 $\beta$  and IL-18 by  
24 ELISA (R & D system) according to manufacturer's instructions.

25  
26  
27  
28  
29  
30  
31  
32  
33  
34  
35  
36  
37  
38  
39  
40  
41  
42

1 **References for online material:**

- 2 1. Sharma, K, McCue, P, Dunn, SR: Diabetic kidney disease in the db/db mouse. *American*  
3 *journal of physiology Renal physiology*, 284: F1138-1144, 2003.
- 4 2. Shahzad, K, Bock, F, Dong, W, Wang, H, Kopf, S, Kohli, S, Al-Dabet, MM, Ranjan, S, Wolter, J,  
5 Wacker, C, Biemann, R, Stoyanov, S, Reymann, K, Soderkvist, P, Gross, O, Schwenger, V,  
6 Pahernik, S, Nawroth, PP, Grone, HJ, Madhusudhan, T, Isermann, B: Nlrp3-inflammasome  
7 activation in non-myeloid-derived cells aggravates diabetic nephropathy. *Kidney*  
8 *international*, 87: 74-84, 2015.
- 9 3. Bock, F, Shahzad, K, Wang, H, Stoyanov, S, Wolter, J, Dong, W, Pelicci, PG, Kashif, M, Ranjan,  
10 S, Schmidt, S, Ritzel, R, Schwenger, V, Reymann, KG, Esmon, CT, Madhusudhan, T, Nawroth,  
11 PP, Isermann, B: Activated protein C ameliorates diabetic nephropathy by epigenetically  
12 inhibiting the redox enzyme p66Shc. *Proceedings of the National Academy of Sciences of the*  
13 *United States of America*, 110: 648-653, 2013.
- 14 4. Gil-Bernabe, P, D'Alessandro-Gabazza, CN, Toda, M, Boveda Ruiz, D, Miyake, Y, Suzuki, T,  
15 Onishi, Y, Morser, J, Gabazza, EC, Takei, Y, Yano, Y: Exogenous activated protein C inhibits the  
16 progression of diabetic nephropathy. *Journal of thrombosis and haemostasis : JTH*, 10: 337-  
17 346, 2012.
- 18 5. Kume, E, Doi, C, Itagaki, S, Nagashima, Y, Doi, K: Glomerular lesions in unilateral  
19 nephrectomized and diabetic (UN-D) mice. *The Journal of veterinary medical science / the*  
20 *Japanese Society of Veterinary Science*, 54: 1085-1090, 1992.
- 21 6. Isermann, B, Vinnikov, IA, Madhusudhan, T, Herzog, S, Kashif, M, Blautzik, J, Corat, MA, Zeier,  
22 M, Blessing, E, Oh, J, Gerlitz, B, Berg, DT, Grinnell, BW, Chavakis, T, Esmon, CT, Weiler, H,  
23 Bierhaus, A, Nawroth, PP: Activated protein C protects against diabetic nephropathy by  
24 inhibiting endothelial and podocyte apoptosis. *Nature medicine*, 13: 1349-1358, 2007.
- 25 7. Madhusudhan, T, Wang, H, Straub, BK, Grone, E, Zhou, Q, Shahzad, K, Muller-Krebs, S,  
26 Schwenger, V, Gerlitz, B, Grinnell, BW, Griffin, JH, Reiser, J, Grone, HJ, Esmon, CT, Nawroth,  
27 PP, Isermann, B: Cytoprotective signaling by activated protein C requires protease-activated  
28 receptor-3 in podocytes. *Blood*, 119: 874-883, 2012.
- 29 8. Wang, H, Vinnikov, I, Shahzad, K, Bock, F, Ranjan, S, Wolter, J, Kashif, M, Oh, J, Bierhaus, A,  
30 Nawroth, P, Kirschfink, M, Conway, EM, Madhusudhan, T, Isermann, B: The lectin-like  
31 domain of thrombomodulin ameliorates diabetic glomerulopathy via complement inhibition.  
32 *Thrombosis and haemostasis*, 108: 1141-1153, 2012.
- 33 9. Madhusudhan, T, Wang, H, Dong, W, Ghosh, S, Bock, F, Thangapandi, VR, Ranjan, S, Wolter,  
34 J, Kohli, S, Shahzad, K, Heidel, F, Krueger, M, Schwenger, V, Moeller, MJ, Kalinski, T, Reiser, J,  
35 Chavakis, T, Isermann, B: Defective podocyte insulin signalling through p85-XBP1 promotes  
36 ATF6-dependent maladaptive ER-stress response in diabetic nephropathy. *Nature*  
37 *communications*, 6: 6496, 2015.
- 38 10. He, JC, Chuang, PY, Ma'ayan, A, Iyengar, R: Systems biology of kidney diseases. *Kidney*  
39 *international*, 81: 22-39, 2012.
- 40 11. Woroniecka, KI, Park, AS, Mohtat, D, Thomas, DB, Pullman, JM, Susztak, K: Transcriptome  
41 analysis of human diabetic kidney disease. *Diabetes*, 60: 2354-2369, 2011.
- 42 12. Hodgins, JB, Nair, V, Zhang, H, Randolph, A, Harris, RC, Nelson, RG, Weil, EJ, Cavalcoli, JD,  
43 Patel, JM, Brosius, FC, 3rd, Kretzler, M: Identification of cross-species shared transcriptional  
44 networks of diabetic nephropathy in human and mouse glomeruli. *Diabetes*, 62: 299-308,  
45 2013.

46

47

48

49
